# Supplementary material for: Efficient and stabilized molecular doping of hole-transporting materials driven by a cyclic-anion strategy for perovskite solar cells
Source: Royal Society of Chemistry journal article supplement (doi:10.1039/d4sc02020k), 2024-01-01
Supplement: d4sc02020k1.pdf [file d4sc02020k1.pdf]

1

## Supporting Information

2 **Efficient and stabilized molecular doping of hole-transporting**  
3 **materials driven by a cyclic-anion strategy for perovskite solar**  
4 **cells**

5 Correspondence to: [luojs@uestc.edu.cn](mailto:luojs@uestc.edu.cn)

6

## Table of Contents

|    |                                              |
|----|----------------------------------------------|
| 7  |                                              |
| 8  | 1. Materials                                 |
| 9  | 2. Characterization                          |
| 10 | 3. DFT calculations                          |
| 11 | 4. Precursor solution and device fabrication |
| 12 | 5. Figures S1-S13                            |
| 13 | 6. Table S1-S6                               |
| 14 |                                              |

## 1. Materials

FAI (99.8%),  $\text{PbI}_2$  (99.999%) and ITO glass were purchased from Advanced Election Technology CO., Ltd. PTAA (99.9%), *t*-BP (99%), Li-TFSI (99%),  $\text{PbBr}_2$  (99.9%), MABr (99.8%) and CsBr (99.9%) were purchased from Xian Yuri Solar Co.,Ltd. Li-CYCLIC (98%) was purchased from TCI. The  $\text{SnO}_2$  (15 wt%) was purchased from Alfa Aesar. The N, N-dimethylformamide (DMF), dimethyl sulfoxide (DMSO), chlorobenzene, ethanol and acetonitrile were purchased from Sigma-Aldrich. All the materials were used as received without any purification.

## 2. Characterization

The electron spin resonance spectroscopy (ESR) was analyzed by a Bruker-E500 spectrometer. The ultraviolet-visible absorption spectrum (UV-vis) was measured by a Hitachi UV-visible spectrophotometer (U-2910). The ultraviolet photoelectron spectroscopy (UPS) measurements were performed by the AXIS ULTRA DLD instrument from Kratos, UK, using a HeI monochromator with 21.22 eV source energy. The steady-state fluorescence spectroscopy (PL) was collected by a Hitachi spectrophotometer (F-4600). The transient fluorescence spectra (TRPL) were measured at room temperature using the time-correlated single photon counting (TCSPC) technique with a FluoroLog-3 modular spectrofluorometer (HORIBA Jobin Yvon). The electrochemical impedance spectroscopy (EIS) of the PSCs under ambient air

37 was recorded by an electrochemical workstation (CHI 660E, Shanghai,  
38 Chenhua) and a solar simulator (Zolix Instrument Co., Ltd. Beijing). The surface  
39 and cross-sectional morphology of the perovskite films were observed by a  
40 scanning electron microscopy (JEOL JSM-7600F). The *J-V* curve of the PSCs  
41 was measured at room temperature using an electrochemical workstation (CHI  
42 660E, Shanghai, Chenhua) under AM 1.5G simulated solar light (100 mW cm<sup>-2</sup>),  
43 and the incident light intensity was calibrated with a standard silicon solar  
44 cell. The incident photon-to-electron conversion efficiency (IPCE) spectra were  
45 performed by using a IPCE measurement system (QTest Station 2000,  
46 CROWNTECH, USA). Regarding the environmental stability of the PSCs, the  
47 devices were kept at ambient conditions (50-85% room humidity and room  
48 temperature) in a dark environment for 40 days. Regarding the working stability  
49 of PSCs, unencapsulated PSCs were continuously tested in a standard  
50 simulated sunlight, room temperature and N<sub>2</sub> atmosphere. The water contact  
51 angle of the films was examined by a droplet shape analyzer (Krüss DSA100).  
52 The atomic force microscopy (AFM) measured by Bruker Dimension Icon AFM  
53 instrument. The two-dimensional grazing incidence X-ray diffraction (2D-GIXD)  
54 images were conducted at the BL14B1 experimental station of Shanghai  
55 Synchrotron Radiation Center with an incident angle of 0.16° and an exposure  
56 time of 30 s. After the devices were heated at 85 °C for 16 hours, the time-of-  
57 flight secondary ion mass spectrometry (TOF-SIMS) was measured using the  
58 ION TOF-SIMS 5 instrument.

### 59 **3. DFT calculations**

60 The calculations of optimized structures, relaxed models and electron  
61 transfer were performed by the CP2K<sup>1</sup> program using the spin-polarized density  
62 functional.<sup>2,3</sup> All calculations used a mixed Gaussian and planewave basis sets.  
63 Norm-conserving Goedecker-Teter-Hutter pseudopotentials were used to  
64 represent core electrons.<sup>4-6</sup> The van der Waals correction of Grimme's DFT-D3  
65 model was adopted.<sup>7</sup> The exchange-correlation functional employed was the  
66 Perdew, Burke, and Enzerhof (PBE)<sup>8</sup> generalized gradient approximation. The  
67 wavefunction of the valence electrons was expanded using a double-zeta basis  
68 set incorporating polarization functions<sup>9</sup>, with an auxiliary plane wave basis set  
69 with an energy cutoff of 360 eV. The configuration was optimized using the  
70 Broyden-Fletcher-Goldfarb-Shanno (BGFS) algorithm, with a SCF  
71 convergence criteria of  $1.0 \times 10^{-6}$  au.

72 The calculations of ESP, PDOS and differential charge maps were  
73 performed by the Gaussian 09W program using the B3LYP exchange-  
74 correlation functional. The calculation of electron exchange-correlation  
75 interactions using the GGA-PBE exchange functional for generalized gradient  
76 approximation in the Dmol3 program.<sup>10</sup> For perovskite, in order to simplify the  
77 calculation, the  $\text{CH}_3\text{NH}_3\text{PbBr}_3$  perovskite model with a stable (001) surface was  
78 used to simulate the trap state. A 20 Å vacuum layer was set, the Monkhorst-  
79 Pack point grid was set to  $2 \times 2 \times 1$ , and the cutoff energy was 600 eV.

80

#### 4. Precursor solution and device fabrication

The ITO glass substrates were ultrasonically cleaned with deionized water, acetone, and ethanol in sequence, each step was more than 30 minutes, and dried with a nitrogen flow, then treated with UV-ozone for 20 minutes. All the solutions were passed through a 0.22-mm filter before use. The SnO<sub>2</sub> solution was prepared by diluting 15 wt% SnO<sub>2</sub> aqueous solutions (600 μL) with 3 mL of isopropanol/H<sub>2</sub>O (1/1, v/v). The SnO<sub>2</sub> solution was spin coated onto an ITO substrate at 4000 rpm for 40 s, and annealed in ambient air at 150 °C for 30 min. 1.2 M MA<sub>0.10</sub>Cs<sub>0.05</sub>FA<sub>0.85</sub>Pb(I<sub>0.95</sub>Br<sub>0.05</sub>)<sub>3</sub> perovskite precursor solution was prepared in mixture solvent of DMF and DMSO (4:1, v/v). The perovskite solution was spin coated with three steps program at 200, 2000 and 4000 rpm for 3, 10 and 25 s, respectively. During the third step, chlorobenzene was poured on the spinning substrate as antisolvent. The spin-coated perovskite precursor films were sequentially heated at 100 and 150 °C. For the control PTAA: Li-TFSI solution, dissolved 15 mg PTAA in 1 mL of chlorobenzene, added 7.5 μL of bis(trifluoromethane)sulfonamide lithium salt (Li-TFSI)/acetonitrile (170 mg/mL) and 7.5 μL of *t*-BP/acetonitrile (1:1 v/v). The PTAA (15 mg) and Li-CYCLIC were dissolved into 1 mL CB and mixed by desired Li-CYCLIC/PTAA ratios ranging from 10% to 20% (mole ratio with respect to the repeat unit mass), and *t*-BP was added at a mass ratio of 1:6 to Li-CYCLIC. The HTL solution was spin-coated on the perovskite layer by spin coating at 3000 rpm for 30 s. Finally, Au electrode was thermally evaporated.

103 **5. Figures S1-S13**

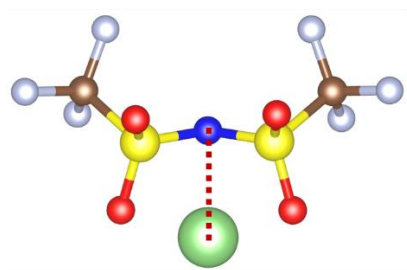

**Li-TFSI 1.980 Å**

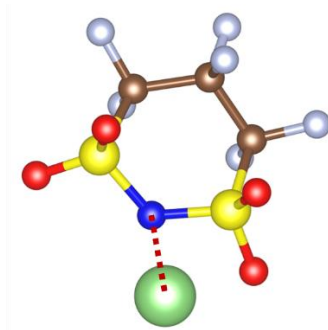

**Li-CYCLIC 1.963 Å**

104

105 **Figure S1.** The distance between the Li atom and N atom in the anion.

106

107

a

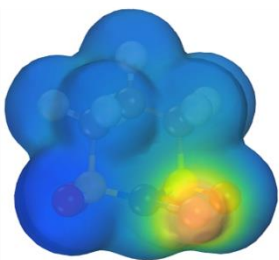

b

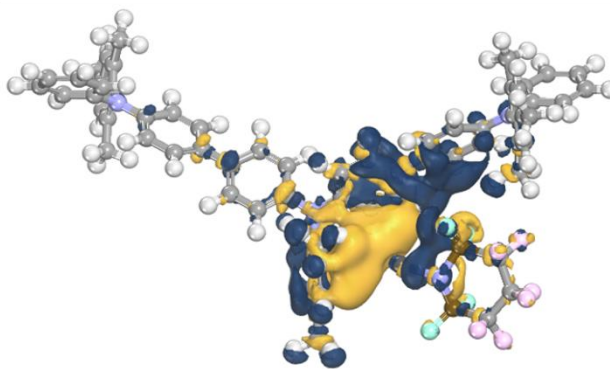

108

109 **Figure S2.** (a) ESP of Li-CYCLIC. (b) Differential charge map of PTAA trimer:

110 Li-CYCLIC (yellow and blue respectively represent the depletion and

111 accumulation of electrons).

112



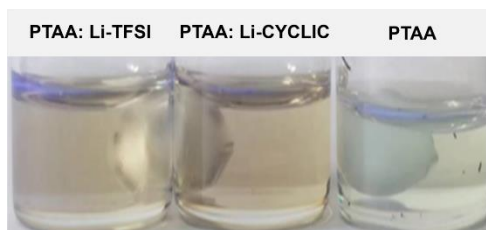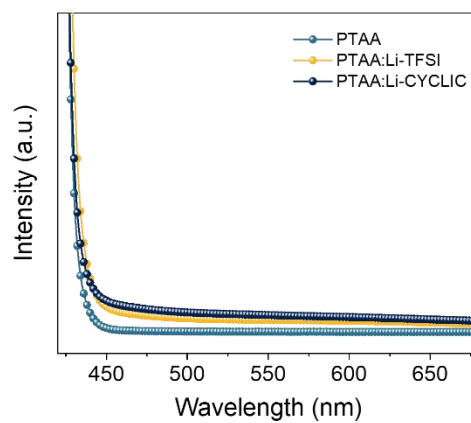

113

114 **Figure S3.** The color change and UV-vis of PTAA, PTAA: Li-TFSI and PTAA:  
115 Li-CYCLIC solutions.

116

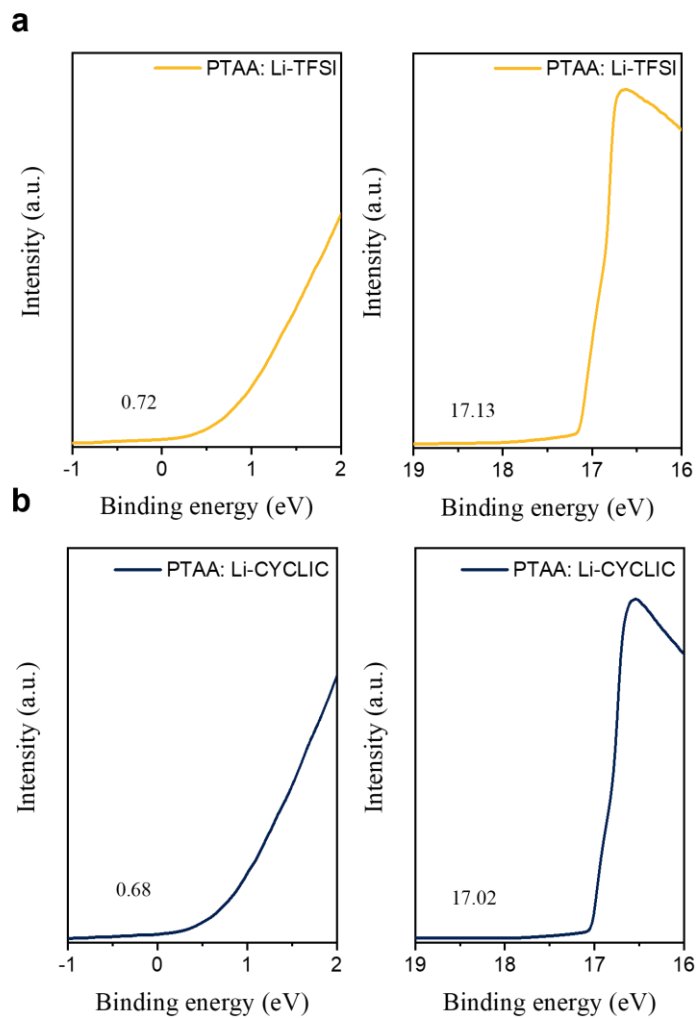

117

118 **Figure S4.** UPS spectra of (a) PTAA: Li-TFSI and (b) PTAA: Li-CYCLIC films,  
 119 the calculated as follows.

120

$$W_F = 21.22 - E_{\text{cut-off}}$$

121

$$\Phi = 21.22 - (E_{\text{cut-off}} - E_i)$$

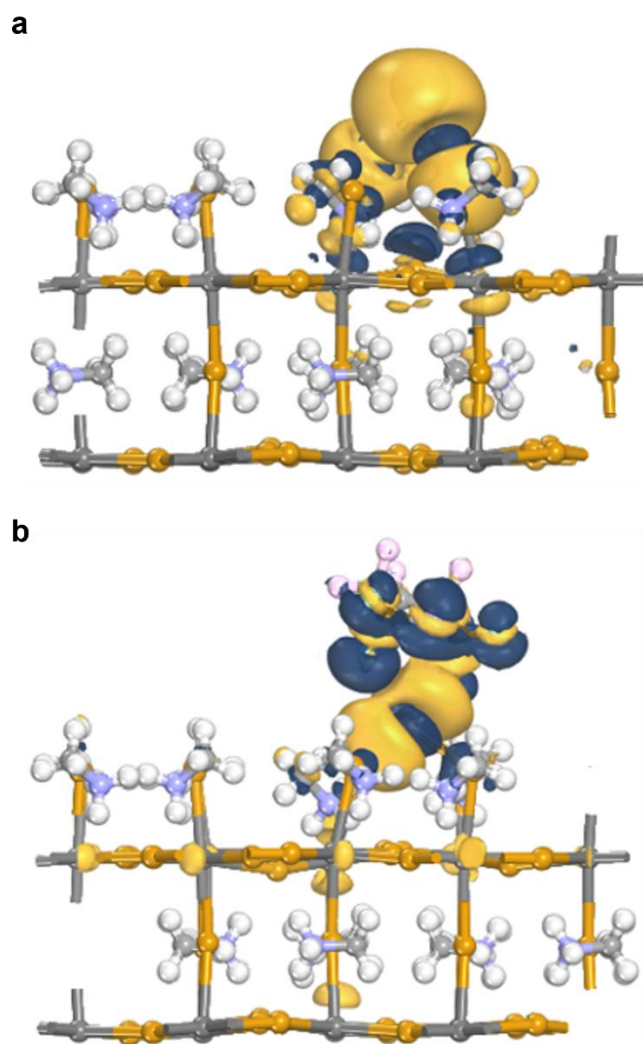

122

123

124 **Figure S5.** Differential charge map of (a) Pb-Pb dimer defects on the surface  
 125 of perovskite (001) and (b) the interaction between Li-CYCLIC and Pb-Pb dimer  
 126 defects (yellow and blue respectively represent the depletion and accumulation  
 127 of electrons).

128

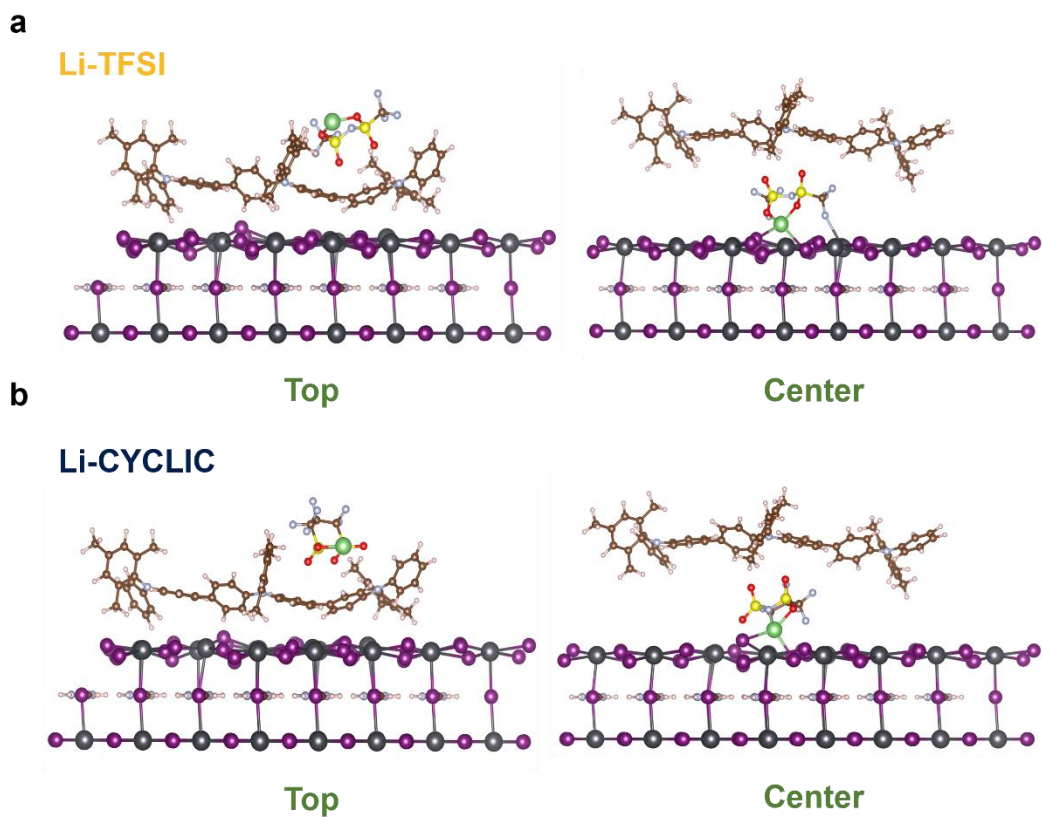

129

130 **Figure S6.** The relaxed models of perovskite and PTAA with (a) Li-TFSI and (b)  
 131 Li-CYCLIC.

132

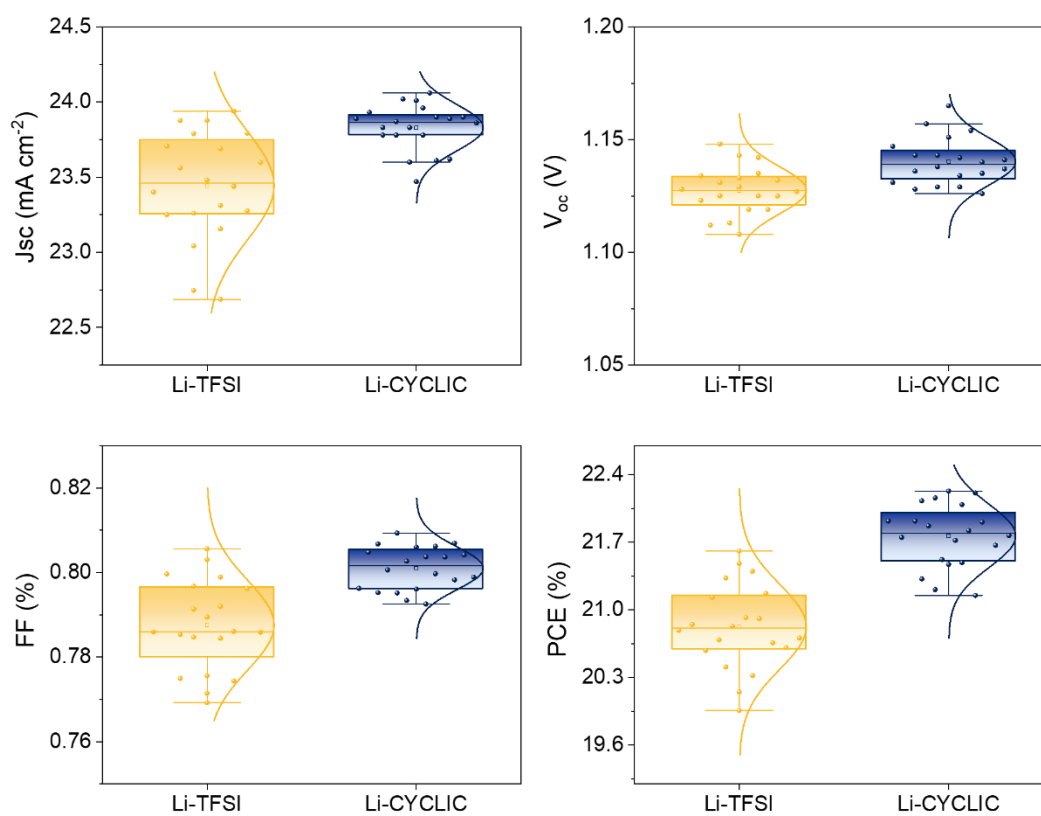

133

134 **Figure S7.** The distribution of photovoltaic parameters for PSCs based on Li-  
 135 TFSI and Li-CYCLIC.

136

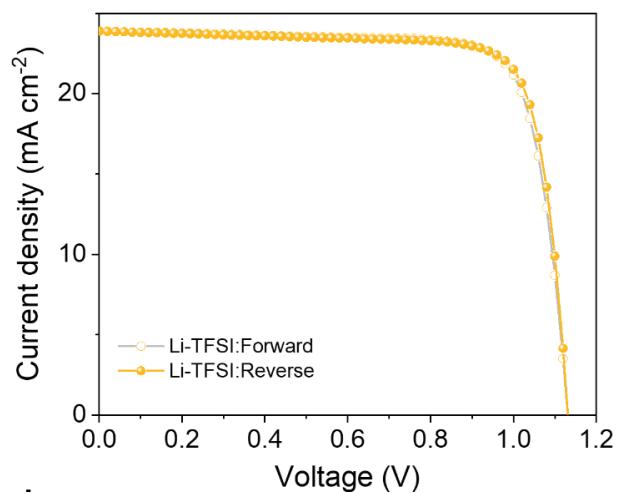

137

138 **Figure S8.** *J-V* curves of PSC based on Li-TFSI under forward and reverse  
139 scans.

140

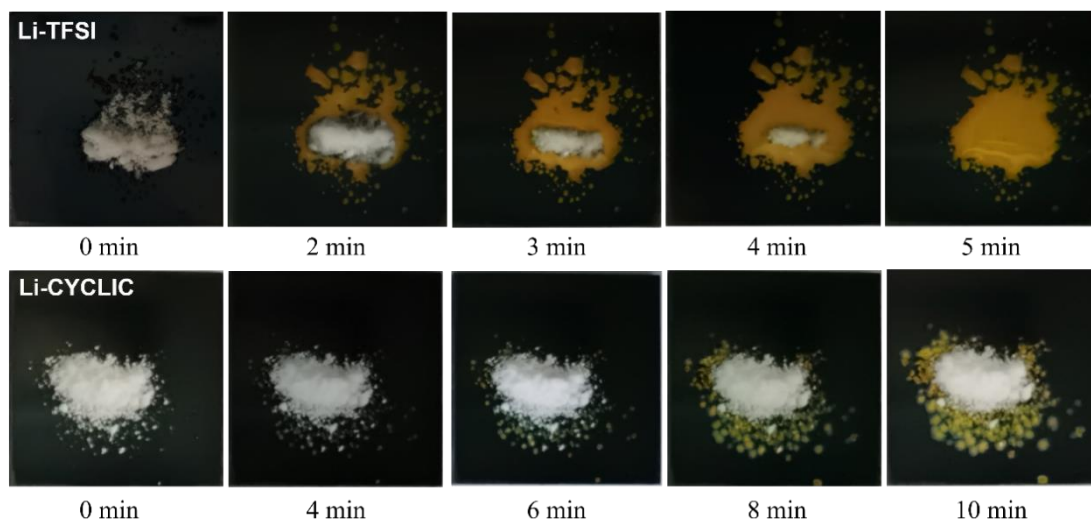

141

142 **Figure S9.** Photos of dopants decomposing perovskite films by absorbing  
143 moisture in the air.

144

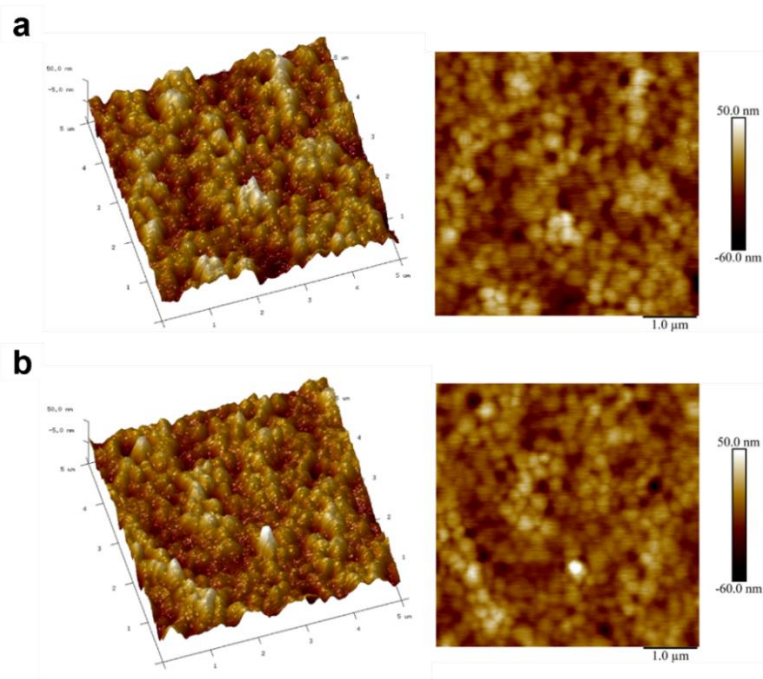

145

146 **Figure S10.** The AFM images of fresh (a) PTAA: Li-TFSI and (b) PTAA: Li-

147 CYCLIC film.

148



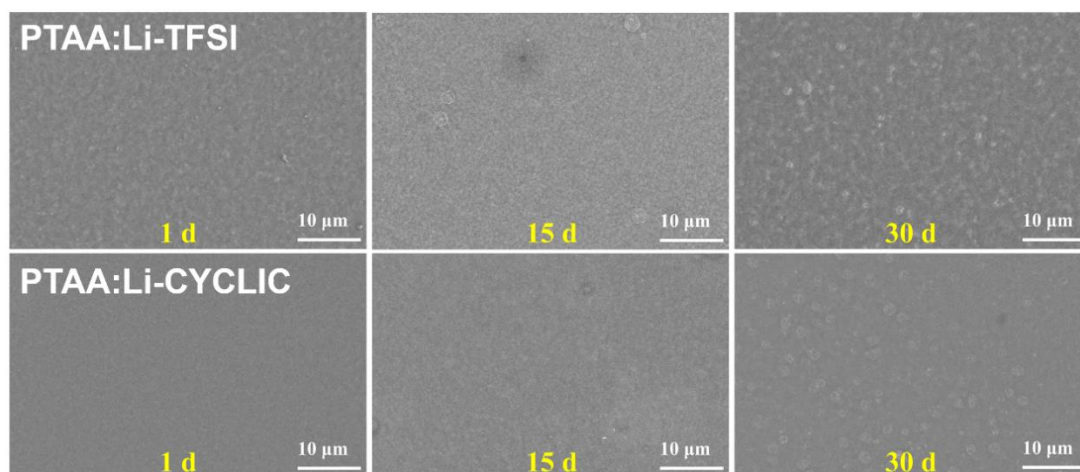

149

150 **Figure S11.** The aged SEM morphology of PTAA: Li-TFSI and PTAA: Li-  
151 CYCLIC films.

152

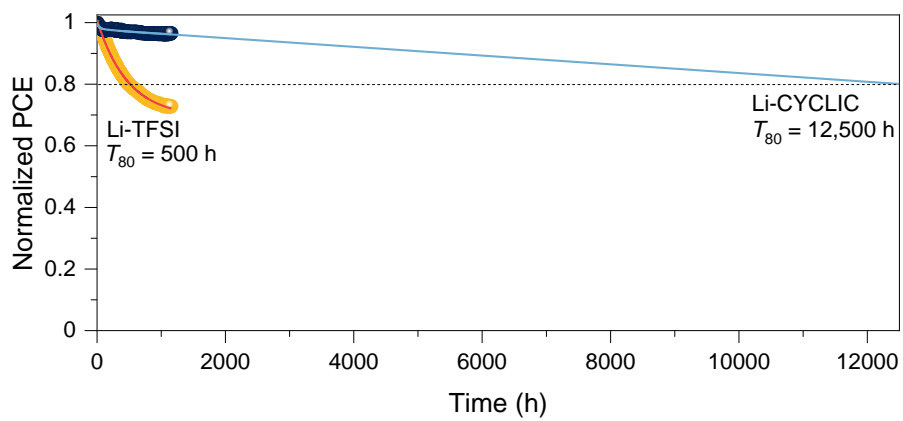

153

154 **Figure S12.** Operational stability and  $T_{80}$  lifetime of PSCs based on Li-TFSI  
 155 and Li-CYCLIC under continuous 1-sun illumination in  $N_2$ .

156

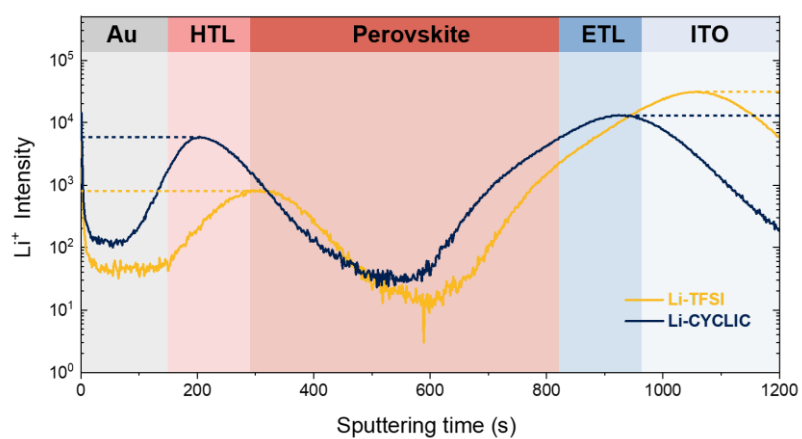

157

158 **Figure S13.** TOF-SIMS results of Li<sup>+</sup> ions in aged devices based on Li-TFSI  
 159 and Li-CYCLIC.

160

161 **6. Table S1-S6**

162 **Table S1.** The calculated total energy values of different forms of dopants  
163 during the action process.

|                                       | Total energy<br>(Hartree) |
|---------------------------------------|---------------------------|
| Li-TFSI                               | -258.761260               |
| Li-CYCLIC                             | -264.423085               |
| PTAA <sup>+</sup>                     | -423.178764               |
| TFSI <sup>-</sup>                     | -251.362776               |
| CYCLIC <sup>-</sup>                   | -257.034427               |
| PTAA <sup>+</sup> TFSI <sup>-</sup>   | -674.577920               |
| PTAA <sup>+</sup> CYCLIC <sup>-</sup> | -680.251864               |

164

165 **Table S2.** The fitting parameters of TRPL data through an exponential model.

| Sample                        | A <sub>1</sub> | τ <sub>1</sub> (ns) | A <sub>2</sub> | τ <sub>2</sub> (ns) | τ <sub>avg</sub> (ns) |
|-------------------------------|----------------|---------------------|----------------|---------------------|-----------------------|
| Perovskite                    | 0.92           | 13.02               | 0.59           | 227.84              | 210.22                |
| Perovskite/PTAA:<br>Li-TFSI   | 1.71           | 2.71                | 0.20           | 33.09               | 20.21                 |
| Perovskite/PTAA:<br>Li-CYCLIC | 2.09           | 2.38                | 0.18           | 23.88               | 12.31                 |

166 
$$y = A_1 \exp\left(-\frac{t}{\tau_1}\right) + A_2 \exp\left(-\frac{t}{\tau_2}\right) + y_0$$

167 
$$\tau_{\text{avg}} = \frac{A_1 \tau_1^2 + A_2 \tau_2^2}{A_1 \tau_1 + A_2 \tau_2}$$

168

169 **Table S3.** The total energy of the PTAA and perovskite with Li-TFSI and Li-  
170 CYCLIC.

| Sample           | Total energy (Hartree) |
|------------------|------------------------|
| Li-TFSI_center   | -2815.749836           |
| Li-TFSI_top      | -2815.778977           |
| Li-CYCLIC_center | -2821.411495           |
| Li-CYCLIC_top    | -2821.429126           |

171

172 **Table S4.** Photovoltaic parameters of the PSCs based on various molarities of  
173 Li-CYCLIC and Li-TFSI.

|                       | $J_{sc}$<br>(mA/cm <sup>2</sup> ) | $V_{oc}$ (V) | FF (%) | PCE (%) |
|-----------------------|-----------------------------------|--------------|--------|---------|
| 10 mol% Li-<br>CYCLIC | 23.39                             | 1.132        | 77.07  | 20.41   |
| 15 mol% Li-<br>CYCLIC | 23.96                             | 1.151        | 80.60  | 22.23   |
| 20 mol% Li-<br>CYCLIC | 23.95                             | 1.127        | 75.61  | 20.42   |
| Li-TFSI               | 23.88                             | 1.133        | 79.89  | 21.61   |

174

175 **Table S5.** The average values and the standard deviation of photovoltaic  
176 parameters for PSCs based on Li-TFSI and Li-CYCLIC.

|                                | Li-TFSI       | Li- CYCLIC    |
|--------------------------------|---------------|---------------|
| $J_{sc}$ (mA/cm <sup>2</sup> ) | 23.44 ± 0.49  | 23.83 ± 0.23  |
| $V_{oc}$ (V)                   | 1.127 ± 0.021 | 1.140 ± 0.017 |
| FF (%)                         | 78.75 ± 1.81  | 80.10 ± 0.83  |
| PCE (%)                        | 20.82 ± 0.79  | 21.77 ± 0.46  |

177



178 **Table S6.** Photovoltaic parameters of the PSCs based on Li-TFSI and 15 mol%  
 179 Li-CYCLIC under forward and reverse scans.

| Dopant               | Scan direction | $J_{sc}$<br>(mA/cm <sup>2</sup> ) | $V_{oc}$<br>(V) | FF<br>(%) | PCE<br>(%) |
|----------------------|----------------|-----------------------------------|-----------------|-----------|------------|
| Li-TFSI              | Reverse        | 23.69                             | 1.133           | 79.89     | 21.61      |
|                      | Forward        | 23.89                             | 1.132           | 79.21     | 21.43      |
| 15 mol%<br>Li-CYCLIC | Reverse        | 23.96                             | 1.151           | 80.60     | 22.23      |
|                      | Forward        | 23.94                             | 1.149           | 80.70     | 22.20      |

180

181 **References**

- 182 1. J. VandeVondele, M. Krack, F. Mohamed, M. Parrinello, T. Chassaing  
183 and J. Hutter, *Comput. Phys. Commun.*, 2005, **167**, 103-128.
- 184 2. P. Hohenberg and W. Kohn, *Phys. Rev.*, 1964, **136**, B864-B871.
- 185 3. W. Kohn and L. J. Sham, *Phys. Rev.*, 1965, **140**, A1133-A1138.
- 186 4. S. Goedecker, M. Teter and J. Hutter, *Phys. Rev. B*, 1996, **54**, 1703-  
187 1710.
- 188 5. C. Hartwigsen, S. Goedecker and J. Hutter, *Phys. Rev. B*, 1998, **58**,  
189 3641-3662.
- 190 6. M. Krack and M. Parrinello, *Phys. Chem. Chem. Phys.*, 2000, **2**, 2105-  
191 2112.
- 192 7. S. Grimme, J. Antony, S. Ehrlich and H. Krieg, *J. Chem. Phys.*, 2010,  
193 **132**.
- 194 8. J. P. Perdew, K. Burke and M. Ernzerhof, *Phys. Rev. Lett.*, 1996, **77**,  
195 3865-3868.
- 196 9. J. VandeVondele and J. Hutter, *J. Chem. Phys.*, 2007, **127**.
- 197 10. B. Delley, *J. Chem. Phys.*, 2000, **113**, 7756-7764.

198
